# Supplementary material for: Genome-Wide Identification and Expression Analysis of YTH Gene Family for Abiotic Stress Regulation in Camellia chekiangoleosa
Source: MDPI journal article supplement (doi:10.3390/ijms25073996), 2024-04-03
Supplement: s1 [file s1]

**Table S1.** Sequences in the evolutionary tree.

| Species name              | Accession number   | name code | sequenceYTH motif                                                                                                                                                                                                                                                                     |
|---------------------------|--------------------|-----------|---------------------------------------------------------------------------------------------------------------------------------------------------------------------------------------------------------------------------------------------------------------------------------------|
| <i>Mimulus guttatus</i>   | Migut.N0 0538.1    | MgDF1 A   | KLSSVAPDREQYNQPEFSVTYDDARFFIIKSYSEDDVHKSIIKYNVWASTPNGNKKLDAAYQDAQQRPG<br>GCPVFLFFSVNTSGQFVGVAEMTGPVDFNKNVEYWQQDKWVGCFPVKWHIVKDLPNSSLKHITLEN<br>NENKPVNTSRDTQEVKLDQGLQVLKIFKDHTSKQCILDDFEFYEDRQKRIQEKKAKQQQY<br>EKSSVTPDLEEYNRPDPETYSDAKFFIIKSYSEDDVHKSIIKYNVWASTSNGNKKLEAAYQDAQQKPGGC |
|                           | Migut.D0 2575.1    | MgDF2 A   | PVFLFFSVNTSGQFVGVAEMVGPVDFNKNVEYWQQDKWIGCFPLKWHIVKDLPNSSLKHITLENNEN<br>KPVNTSRDTQEVKLEPGLAVLKIFKDHTSRQCILDDFEFYEDRQKKIQEKKARQQQF                                                                                                                                                      |
|                           | Migut.J00 855.1    | MgDF1 B   | VESTSKLHVHHLNSPDFITDYDRAKFFVIKSFSEDNIIHKSIIKYSVWASTPLGNRKLDAAAYCETKEMEGIC<br>PVFLFFSVNASGQFCGVAEMIGPVDFENDADYWQQDRWSGQFPVKWHIHKDVPNSRFRHILLENNEN<br>KPVTHSRDSQEVKLEQGIEMQLQIFKNHDAETSLDDFNFYDEREKTLLERKAKQRAI                                                                         |
|                           | Migut.O0 0389.1    | MgDF1 C   | AQGNITIFKDQYNKIDFPVDYANAKFFVIKSYSEDDVHKSIIKYNVWSSTPNGNKKLTTAYQDAHRTTL<br>GDLRGCPIFLFFSVNASGQFCGVAEMTGPVDFHRDMDFWQQDKWSGSFPVKWHIHKDLPNSNFRHIIL<br>ENNENKPVNTSRDTQEICYEKGLEMLRIYKSHTLKTSLDDFMYYENRQRILQEERTRLLRK                                                                        |
|                           | Migut.G0 0015.1    | MgDF2 C   | AQGNITIFKDQYNKIDFPVDYANAKFFVIKSYSEDDVHKSIIKYNVWSSTPNGNKKLTTAYQDAHRTGL<br>GDLRGCPIFLFFSVNASGQFCGVAEMTGPVDFHRDMDFWQQDKWSGSFPVKWHIHKDLPNSNFRHIIL<br>ENNENKPVNTSRDTQEICYKKGLEMLRIYKSHTLKTSLDDFMYYENRQRILQEERTRLLRK                                                                        |
|                           | Migut.N0 0839.1    | MgDF3 C   | EQIGLPAKVDFKNLQDFQTVYENAKFYVIKSYSEDDIHKSIKYDVWSSTQNGNRKLDAAFNEANARTN<br>CPVFLFFSVNASGQFVGVAEMIGHVDFSKSMDFWQLDKWNGFFPLQWHIVKDVNTLLRHILLENNND<br>NRPVTFTRDTQEIGLKQGLEMLSIFKNHSGKSLDDYSFYEKREKELKAKRKNAARS                                                                               |
|                           | Migut.H0 1337.1    | MgDC1 A   | SRNATPLPQGASRYFVVKSCNRENLELSVQQGVWATQRSNEAKLNEAFESVENIILFVSNKTRHFQGC<br>AKMTSRIGGSVGGGNWKHAHGTAAHYGRNFALKWLKLCELTFDKTRHLRNPYNENLPVKISRDCQEL<br>PSIGEQLASLLYLEPDSDLMAIAIAAELKREEEK                                                                                                     |
|                           | Migut.M0 1886.1    | MgDC2 A   | SRTATPLPQGTSTRYFVVKSCNRENLELSVQQGVWATQRSNEAKLNEAFESVDNIILFVSNKTRHFQGC<br>AKMTSRIGGSISGGNWKNAHGTAAHYGNFVSVKWLKLGELSFNKTTRHLRNPFNENLPVKISRDCQELE<br>PSIGEQLASLLYLEPDSDLMAVALAAEAKREEEK                                                                                                  |
|                           | Migut.A0 0893.1    | MgDC1 B   | SSEMKKDKLNNTRYFIIKSLNHNENIQLSVKKEIWATQVMNEPILEEAFQNSGKVLIFSVNMSGFFQGYA<br>QMMSSVGWRRDTIWSQASGKSNPWGRSFKVWLRNLDAFQKTLHLKNPWNDFKPVKISRDCQELP<br>GDIGRALCELLDEGGGIDLNLKRDEIARGDFSASR                                                                                                     |
|                           | Eucgr.B03 590.1    | EgDF1 A   | NKVSVIPDREQYNKADFPEDYEDAKFFIIKSYSEDDVHKSIIKYSVWASTPNGNKKLDAAYREAQEKPGS<br>SPVFLFFSVNTSGQFVGVAEMVGPVDFHKSVEYWQQDKWNGCFPVKWHIVKDVNSMLKHITLENN<br>ENKPVNTSRDTQEVKLQGLKMIKIFKEHPVKTCLFDDFEFYENRQKAIQEKKARQQYQ                                                                             |
| <i>Eucalyptus grandis</i> | Eucgr.B03 591.1    | EgDF2 A   | NRSSVVPDCTQYNKVDFPEDYNDKAFIIKSYSEDDVHKSIIKYNVWASTPNGNKKLDAAYREAQEKKA<br>AGCPIFLFFSVNTSGQFVGVAEMVGPVDFHKNVEYWQQDKWMGCFPVKWHIVKDVPNLLKHITL<br>NNENKPVNTSRDTQEVKLQGLKMIKIFQTHLVKTCLDDDFEYENRQRAIQEKKARQLQF                                                                               |
|                           | Eucgr.J03 195.1    | EgDF1 B   | SASITKIPHGSYNHIDFITEYDDAKFFVIKSYSEDNVHKSIIKYGWASTPNGNRKLDAAAYREAKEKPDTC<br>PVFLFFSVNASAHFCGVAEMVGPVDFDRSFDYWQQDRWSGQFPVKWHIVKDVPSQLRHIVLENND<br>NKPVTNSRDTQEVKLEQGIEMLNIFKNYETDTSILDDFEFYEREKVIQEGKARQQAS                                                                             |
|                           | Eucgr.H0 4096.1    | EgDF1 C   | AQGIHIDTDQYNKDDFCVDYEDAKFFVIKSYSEDDVHKSIIKYNVWSSTPHGNKKLQSAVEDAQKIAAE<br>KTTNCPIFLFFSVNASGQFCGVAEMVGQVDFHKNMDFWQQDKWTGSFPVKWHIHKDQNTAFRHIIL<br>ENNENKPVNTSRDTQEIMQKQGLEMLKIFKNNGLKTSLDDFTYEGRQKLMQEERARMYVS                                                                           |
|                           | Eucgr.E02 496.1    | EgDC1 A   | GRGPTPLPPGVSRYFIVKSCNRENLELSVQQGVWATQRSNEAKLNEAFDSAANVILFVSNRTRHFQGC<br>AKMTSRIGGAASGGNWKYAHGTAAHYGRNFVSVKWLKCELSFQKTRHLRNPYNENLPVKISRDCQELE<br>PSVGEQLASLLYLEPDSSELMPISLAAESKREEEK                                                                                                   |
|                           | Eucgr.D0 1949.1    | EgDC1 B   | SIANRKGWYSIRYFIIKSLNHHNLQLSIEKGIWATQVMNEPILEEAFHNSGKVLIFSVNMSGFFQGYA<br>QMMSPIGWRRDKVWSQGNRNRPWGRSFKVWLRLYDLFPQKTLHLKNLLNDNKPVKISRDCQELP<br>QDVGEALCELLDCCADVDGETRRDSAPLEK                                                                                                            |
| <i>Glyma</i>              | Glyma.08 G124600.1 | GmDF1 A   | DKTSTVPDRDQYNKADFPPEYTDKFFVIKSYSEDDIHKSIKYNVWASTQNGNKKLDAAYHEAQQKP<br>GGCPVFLFFSVNTSGQFVGVAEMIGPVDFNKSVEYWQQDKWNGCFPLKWHVVKDVPNNLLRHITLD<br>NNENKPVNTSRDTQEVMLEPGLKLIKIFKEYTSKTCILDDFGFYEARQKTILEKKAKQQFP                                                                             |
|                           | Glyma.05 G166600.1 | GmDF2 A   | DKTSTILECDQYNKADFPPEYTDKFFVIKSYSEDDIHKSIKYNVWASTQNGNKKLDAAYQEAQQKPG<br>GTPVFLFFSVNTSGQFVGVAEMIGPVDFNKSVEYWQQDKWNGCFPLKWHIVKDVNNLLRHITLDNN<br>ENKPVNTSRDTQEVMLEPGLKLIKIFKEYTSKTCILDDFGFYEARQKTILEKKAKQQFP                                                                              |
|                           | Glyma.19 G110800.1 | GmDF3 A   | KEVPPVPDKEQYNGKDAENYSDAKFFVIKSYSEDDIHKSIKYSAWASTPNGNKKLDAAYQEAKEKPG<br>GCPIFLLFSVNTSGQFVGVAEMLGPVDFGKTVDYWWQDRWTGCFVSKWHIVKIDIPNSVLRHITLENNE<br>NKPVTNSRDTQEVKFEKGVQIAKIFKEHSSQTCILDDFGFYEARQKTILEKKAKQQQL                                                                            |
|                           | Glyma.16 G041600.1 | GmDF4 A   | KEVPLVPDKEQYNGKDLAENYSDAKFFVIKSYSEDDIHKSIKYSAWASTPNGNKKLDSAYQEAKEKPG<br>GCPIFLLFSVNTSGQFVGVAEMLGPVDFGKTVDYWWQDRWTGCFVSKWHIVKIDIPNSVLRHITLENNE<br>NKPVTNSRDTQEVKFEKGVQLVKIFKEHSSQTCILDDFGFYEDREKVTQEKKSKEQQL                                                                           |
|                           | Glyma.02           | GmDF5     | KEVPLVPNNEQYNGKDFPENYSDAKFFVIKSYSEDDIHKSIKYVWASTFNGNKKLDAAYHESKEKPG                                                                                                                                                                                                                   |

|                       |           |       |                                                                                                                                       |
|-----------------------|-----------|-------|---------------------------------------------------------------------------------------------------------------------------------------|
| <i>Glycine max</i>    | G072000.1 | A     | DCPVFLFSVNTSGQFVGLAEMVSPLDFGRTVEYWQQDRWSGCFSVKWHIIKDIPNSVLRPITLNNEN<br>KPVNTSRDTQEVKFEKGIQILKIFKQHSSKTCILDDFGFYETREKMIQERKSMEQQL      |
|                       | Glyma.08  | GmDF1 | SASTAKFQNESLNRSDFATDYKDAKFFVIKSYSEDNVHHSIKYGVWASTPNGNRKLDDAYRQAMEKQ                                                                   |
|                       | G226100.1 | B     | DACPIFLFFSVNASAQFCGVAEMVGPVNFDSVDFWQQDKWWSGQFPVKWHIIKDVPNSSQFRHIILENN<br>DNKPVNTSRDTQEVKLGQGVEMLTIFKNYETDVSILDDDFDYEDRQKAMQERKARQQSS  |
|                       | Glyma.07  | GmDF2 | SGSTAKFQNESLNRSDFATDYKDAKFFVIKSYSEDNVHHSIKYGVWASTPNGNRKLDDAYRQAMEKQ                                                                   |
|                       | G000900.1 | B     | DACPIFLFFSVNASAQFCGVAEMVGPVNFDSVDFWQQDKWWSGQFPVKWHIIKDVPNSSQFRHIILENN<br>NDNKPVTNSRDTQEVKLTQGVEMLTIFKNYETDVSILDDDFDYEDRQKAMQERKARQQSS |
|                       | Glyma.17  | GmDF1 | TQENIIISTDQYNREDFPVNYENAKFFVIKSYSEDDVHHSIKYNVWSSTPHGNKKLQSTHEDAKRIASGN                                                                |
|                       | G038400.1 | C     | FGSCPIFLFFSVNASGQFCGVAEMIGPVDNFNDMDFWQQDKWWSGFPVKWHIIKDVPNANFRHIILENN<br>NENKPVNTSRDTQEIMYSKGLEMLKIFKNHNLKTSLLDDFMYENRQKIMQEEKAKLLIR  |
|                       | Glyma.07  | GmDF2 | TQENIIISTDQYNREDFPVNYENAKFFVIKSYSEDDVHHSIKYNVWSSTPHGNKKLQSAHEDAKRIASGK                                                                |
|                       | G233400.1 | C     | FGSCPIFLFFSVNASGQFCGVAEMIGPVDNFNDMDFWQQDKWWSGFPVKWYIIKDVSNANFRHIILENN<br>NENKPVNTSRDTQEIMYSKGLEMLKIFKNHHLKTSLLDDFIYYENRQKIMLEEKTKLLIR |
|                       | Glyma.15  | GmDF3 | EQGNIVYIPDQYNMEDFPLGYENAKFFVIKSYSEDDVHHSIKYNVWSSTPHGNKKLENAYEDAKKIAA                                                                  |
|                       | G136400.1 | C     | EKSEVCPILLFSVNASGQFCGVAEMVGTVDFSKNMDFWQQDKWWSGFPVKWHIIKDVNPNNFRHIIL<br>ENNENKPVNTSRDAQEIMYLKGLEMLKIFKNHTLKTSLDDFMYENRQKIMQDEKAKFLVK   |
|                       | Glyma.09  | GmDF4 | EQGNIVYIPDQYNKEDFSLDYENAKFFVIKSYSEDDVHHSIKYNVWSSTPHGNKLENAYEDAKKIAAAEK                                                                |
|                       | G031200.1 | C     | SEVCPILLFFSVNASGQFCGVAEMVGTVDNFKNMDFWQQDKWWSGFPVKWHIIKDVNPNNFRHITLEN<br>NENKPVNTSRDTQEIMYWKGLEMLKIFKNNTLKTSLDDFMYENRQKIMQDEKA         |
|                       | Glyma.15  | GmDF5 | GNVTNKIRADQYNLPDFPTKYDHALFFVIKSYSEDDIHSIKYNVWASTPNGNKRLDGAFAQKRM                                                                      |
| <i>Prunus persica</i> | G265400.1 | C     | EEKGCKCPVFLFFSVNASGQFCGVAEMTGRVDFNKSMDFWQQDKWNGYFPVKWHIIKDVNPQLRH<br>IILENNDHKPVTSRDTQEVSPQGVEMLNIFKNYVARTSILDDFEFYESRQKVMQEKTRQSM    |
|                       | Glyma.08  | GmDF6 | GNVTNKIRTDQYNLPDFPTKYDHALFFVIKSYSEDDIHSIKYNVWASTPNGNKRLDGAFAQKRM                                                                      |
|                       | G162200.1 | C     | EKGCKCPVFLFFSVNASGQFCGVAEMTGRVDFNKSMDFWQQDKWNGYFVSVKWHIIKDVNPQLRHII<br>LENNDHKPVNTSRDTQEVSPQGVEMLNIFKNYVARTSILDDFEFYESRQKVLQEKTRQSM   |
|                       | Glyma.15  | GmDC  | NRTATPLPQGISRYFIVKSCNRENLELSVQQGVWATQRSNESKLEAFDSVENVILVFSVNRTRHFQGC                                                                  |
|                       | G128500.1 | 1A    | AKMTSRIGGSVAGGNWKYAHGTAHYGRNFSVKWLKLCESLHFKTRHLRNPYNENLPVKISRDCQELE<br>PSIGQLASLLYLEPDSELMAISVAAESKREEEK                              |
|                       | Glyma.09  | GmDC  | NRTATPLPQGISRYFIVKSCNRENLELSVQQGVWATQRSNESKLEAFDSVENVILVFSVNRTRHFQGC                                                                  |
|                       | G022200.1 | 2A    | KMTSKIGGSVAGGNWKYAHGTAHYGRNFSVKWLKLCESLHFKTRHLRNPYNENLPVKISRDCQELEP<br>SIGQLASLLYLEPDSELMAISVAAESKREEEK                               |
|                       | Glyma.01  | GmDC  | PTGIGVEKWHNIKYFIIKSLNHQNIHLSIEKGIWATQIMNEPILEEAFHNSGSVILIFSVNMSGSFQGYAQ                                                               |
|                       | G214100.1 | 1B    | MMSSIGRGRDNVWSEGTGKSNPWGRSFKVKWMCLNDLPFHKTLLHLKNPLNDYKPKISRDCQELSP<br>DIGLALCELLDGKNYTDCLPTSLSRDEFSLKG                                |
|                       | Glyma.11  | GmDC  | PAGIGVEKCHNTKYFVIKSLNHQNIHLSIEKGIWATQIMNEPILEEAFHNSGSVILIFSVNMSGSFQGYA                                                                |
|                       | G027800.1 | 2B    | QMMTSIGRGRDNAWSEGTGKSNPWGRSFKVKWLCLNDLPFHKTLLHLKNPLNDYKPKISRDCQELSP<br>DIGLALCKLLDGKNDTDGLLTSLSRDEFSLKG                               |
|                       | Prupe.6G  | PpDF1 | KDKTSVPDREQYNKADFPEDYTDKFFIIKSYSEDDVHHSIKYNVWASTPNGNKKLHAAAYQEAQEKSG                                                                  |
|                       | 002200.1  | A     | GCPVFLFSVNTSGQFVGLAEMLGPVDNFKNLEYWQQDKWNGCFPVKWHIVKDVPNSSLKHITLEN<br>NENKPVNTSRDTQEVKLEPGLKMIKIFKEHLSKTCILDDFGFYESRQKTIQEKKAKQQQF     |
|                       | Prupe.3G  | PpDF1 | NTTATKVHDESYNKPDPVTEYNDAKFFIIKSYSEDNVHHSIKYGVWASTPNGNRKLDDAYREVKEKHD                                                                  |
|                       | 027100.1  | B     | GCPILFFSVNASAQFCGVAEMVGPVDFDKSLDYWQQDKWWSGQFPVKWHMIKDVPNSSQFRHIILENN<br>DNKPVNTSRDTQEVKLEHGIEMLNIFKNYETDMSILDDDFDYEDRQKAMQERKARQQAS   |
| <i>Prunus persica</i> | Prupe.1G  | PpDF2 | GLSASGINLDSFNRLDFVTDYEDAKFFIIKSFSEDNVHHSIKYSVWASTPHGNKKLDAAYHEAQRIKGC                                                                 |
|                       | 002400.1  | B     | PVFLFFSVNASGQFCGVAEMVGSVDFEKDADYWQQDRWSGQFPVQWHIIKDVPNIRFRHILLENNDN<br>KPVTHSRDCQEVNLKQGIELLKIFGDYDARTSIIDDFEFYDEREKSLEKRVKQAC        |
|                       | Prupe.1G  | PpDF1 | AQGNIIIRTDQYNKDELVPDYVDAKFFVIKSYSEDDVHHSIKYNVWSSTPHGNKKLNSAYEDALRIAAG                                                                 |
|                       | 109700.1  | C     | KPRGCPILFFSVNASGQFCGVAEMGPPVDNFNDMDFWQQDKWWSGFPVKWHIIKDVNPNTSFRHIVLE<br>NNENKPVNTSRDTQEIMYKKGLEMLKIFKNHTLKTSLDDFMYEERQKFMQEERSRLVR    |
|                       | Prupe.4G  | PpDF2 | DSIASAIRKDQYNLPDFPTKYEQALFFVIKSYSEDDIHSIKYNVWASTPNGNKRLDSAYQDAEEKVAQ                                                                  |
|                       | 124900.1  | C     | KSCKCPVFLFFSVNASGQFCGVAEMIGRVDNFNKSMDFWQQDKWNGYFPVKWHIIKDVNPQLRHII<br>ENNENKPVNTSRDTQEVKFLQGIEMLNIFKNHLSKTSILDDDFEFYESRQKVMQEKRIQSTP  |
|                       | Prupe.1G  | PpDF3 | EELSFTVHRDQYNLPDFQTDYEKAKFYVIKSYSEDDVHHSIKYDVWASTPNGNKKLDASFRDAESKSRE                                                                 |
| <i>Prunus persica</i> | 579100.1  | C     | TGTQCPILFFSVNGSGQFIGLAEMAGQVDNFNDMDFWQVDKWSGFPVKWHVIKDPNTQLRHII<br>NNDNRPVTFTRDTQEIGLKQGLEMLNIFKSYTAKTSLDDFIFEDREKSLKAKRSSKPAT        |
|                       | Prupe.4G  | PpDC1 | ANRSAPLPQGISRYFIVKSCNRENLELSVQQGVWATQRSNESKLEAFDSAENVILIFSVNRTRHFQGC                                                                  |
|                       | 089500.1  | A     | AKMMSRIGGSVSGGNWKYAHGSAHYGRNFSVKWLKLCESLHFKTRHLRNPYNENLPVKISRDCQELE<br>PSIGQLASLLYLEPDSELMAVSIAAESKREEEK                              |
| <i>Prunus persica</i> | Prupe.5G  | PpDC1 | TTGRKKGTLYDTRYFIIKSLNHQNIQLSIEKGIWATQVMNEPILEEAFHNSGKVLIFSVNMSGSFQGYA                                                                 |
|                       | 086300.1  | B     | QMMSSVGWRRDNVWSQSSRNPWGRSFKVKWLQNLNDLPFQKTLHLKNPLNEYKPKISRDCQELSP<br>DVGEALCELLDGTNDVNGLSVAMEDFPSKR                                   |

*Populus  
trichoca  
rpa*

|                           |            |                                                                                                                                                                                                                         |
|---------------------------|------------|-------------------------------------------------------------------------------------------------------------------------------------------------------------------------------------------------------------------------|
| Potri.003<br>G222700.1    | PtDF1A     | DKTTVVPDREQYNKADFPPEEYDNAKFFIIKSYSSEDDVHKCIKYNVWASTPNGNKKLDAAYQEAQKS<br>GGCPVLLFSVNTSGQFVGLAEMTGRVDFDKSV EYWQQDKWTGYFPVKWHIVKDV PNSFLKHITLEN<br>NENKPVTNSRDTQEVKLEQGLKLIKIFKDHSSKTCILDDFVFYEDREKMIQEKKAKQQQL            |
| Potri.001<br>G002000.1    | PtDF2A     | DKTTEVPDREQYNKADFPVEYVDAKFFIIKSYSSEDDVHKCIKYNVWASTPNGNKKLDAAYQEAQKS<br>GGCPVLLFSVNTSGQFVGLAEMTGRVDFDKSV EYWQQDKWTGYFPVKWHIVKDV PNSLLKHITLEN<br>NENKPVTNSRDTQEVKLEQGLEMIKIFKEHSSKTCILDDFGFYEDREKMIQEKKAKQQQL             |
| Potri.019<br>G034300.1    | PtDF3A     | ENLLQIPDREQYNKEDFPEEYSDAKFFVIKSFSEDDVHKS IKYSVWTSTPNGNKKLDAAYKQGKENPGD<br>CPVLLFSVNTSGQFVGLAEMVGPVDFNKTVEYWQQDKWTGCFPLKWHI IKDVPNGCLR HITLENNE<br>NKPVTNSRDTQEVIFEKGVQILKIFKDHKGKTSILDDFSFYAGRERIMQEKRAKHNIH            |
| Potri.014<br>G001000.1    | PtDF1B     | SKPSAKIHDESYNQSD FVTEYKDAKFFIIKSYSSEDNVHKS IKYGVWASTPNGNRKLD TAYHEAKDKQDP<br>CPVLLFSVNASAQFCGVAEMVGPVDFDKSV DYWQQDKWSGQFPVKWHI IKDVPNSQFRHIVLENN<br>DNKPVTNSRDTQEVKLEQGV EMLNIFKNYETDTSILDDFDFYEDRQKAMQDRKARQQAS        |
| Potri.007<br>G002800.1    | PtDF2B     | SKPSAKIHDESYNQPD FVIEYKDAKFFIIKSYSSEDNVHKS IKYGVWASTPNGNRKLD TTYREAKEKQDPC<br>PVLLFSVNASAQFCGVAEMTGPVDFDKSV DYWQQDKWSGQFPVKWHI IKDVPNSQFRHIVLENN<br>NKPVTNSRDTQEVKLEQGI EMLNIFKNYETDMSIIDD FDFYEDRQKAMQERKARQQAS        |
| Potri.006<br>G079900.1    | PtDF3B     | NSASSGIQLDLYNQ LDFVTDYKDAKFFIIKSFSEDNVHKS IKYSVWASTPHGNKKIDAAYREAKEKEGN<br>CPVLLFSVNASGQFCGVAEMVGPVDFE KDAEYWQQDRWNGQFPVQWHIVKDV PNSRFRHILLENN<br>DNKPATHSRDSQEVKLEQGI EMLKIFKDHDAPTSILDDFDFYDQCERALKERKAKQQPS          |
| Potri.018<br>G149800.1    | PtDF4B     | NSASSGVQLDLYNRP VFVTDYKNAKFFIIKSFSEDNVHKS IKYSIWASTPHGNKKIDAAYREAKEKEGN<br>CPVLLFSVNASGQFCGVAEMVGPVDFE KDA DYWQQDRWNGQFPVQWHI IKDVPNSRFRHILLENN<br>DHKPVTHSRDSQEVKLEQGI EMLKIFKDYDAPTSIID FGFYDQCERALKERKAIQQPS         |
| Potri.001<br>G056100.1    | PtDF5B     | QKAVADVHSESHNQV D FADYKDAKFFVIKSYSSEDNVHKS IKYGVWASTPNGNKKLDAAYREAKEN<br>HGTCPIFLLFSVNASAQFCGVAEMVGPVDFDK NVDFWQQDKWSGQFPVKWHI IKDVPNSQFRHIVLE<br>NNDNKPVTNSRDTQEVELEQGA EMLGIFKNYESH SILD FQFYERQKVMQVRKSRPQAS         |
| Potri.010<br>G152300.1    | PtDF1C     | GLGNIVIQTDQYNKDD FSTDYLD AKFFVIKSYSSEDDVHKS IKYNVWSSTPHGNKKLQ TAFEDAQKLAV<br>GRPRGCPIFLFFSVNASGQFCGVAEMIGPV DLHRDMDFWQQDKWSGFLVKWHI IKDIPNSSFRHIILE<br>NNENKPVTNSRDTQEIMYKQGLEMLKTFKNHPLR TSILDDFMYENRQKIMQDEKARLMFK    |
| Potri.008<br>G100200.1    | PtDF2C     | ELGNIVIQTDQYNKDD FSTDYAD AKFFVIKSYSSEDDVHKS IKYNVWSSTPHGNKKLHSAFEYAQKLDL<br>GRPRGCPIFLFFSVNASGQFCGVAEMVGPVDFNR DMDFWQQDKWSGFLVKWHI IKDIPNSSFRHIILE<br>NNENKPVTNSRDTQEIMYKQGLEMLKMFKNHPLK TSILDDFVYYENRQKIMQEEKARLMFK    |
| Potri.010<br>G175500.1    | PtDF3C     | NSITSVISRDQYNLP DFPNTYDHAFFVVIKSYSSEDDIHKSIKYNVWASTPNGNKRLNSAYLDSQQKIAQI<br>GCSCPVLFFSVNASGQFCGVAEMTGRVDFNKNM DFWQQEKWNGYFPVKWHI IKDIPNPQLRHIILE<br>NNENKPVTNSRDTQEVKFPQGI EILNIFKNYVSKTSILDDFDFYESRQKVMHERRPRSLIS      |
| Potri.008<br>G080800.1    | PtDF4C     | NSIASVISRDQYNLP DFPPTYKNHAFFVVIKSYSSEDDIHKSIKYNVWASTPNGNKRLDSAYQDAQQKIAE<br>KGNSCPVLFFSVNASGQFCGVAEMVGRVDFNKNM DFWQQDKWNGYFPVKWHI IKDVPNPQLRHII<br>LENNENKPVINSRDTQEVKFPQGI EILNIFKNYVT KTSILDDFDFYESRQKVMQEKRPRFPFIP   |
| Potri.004<br>G223800.1    | PtDF5C     | DMLGFAMHKEQYNLP DFEI EYSNAKFFVIKSYNEDDIHKSIKYDVWASTPNGNKKLDAAFHNAEEVSS<br>ETGTCPIFLFFSVNGSGQFVGLAEMVGQVDFN KDMDFWQIDKWNGFFPVKWHVIK DIPNGQLRHIV<br>LENNDGHSVTF SRDTQEIGLEKGLEMLNIFKSYS AKTSM LDDFNFYENREKSLNTKKS NKPAT   |
| Potri.003<br>G008400.1    | PtDF6C     | DELGIAMRKEQYNLP DFE TEYANAKFFVIKSYSSEDDIHKSIKYDVWASTPNGNKKLDAAFHNAEEVSS<br>DTGYKCPIFLFFSVNGSGQFVGFAEMVGQVDFN KDMDFWQIDKWNGFFPVKWHVVK DIPNGHLRHI<br>VLENNDGHSVTF SRDTQEIVLKQGLEMLNIFKSYS AKTSL LDDFNFYEKREKSLNTKKG NKPAT |
| Potri.001<br>G357800.1    | PtDC1<br>A | SSFFSCVSPSQFVYFIVKSCNRENLELSVQQGVWATQRSNEIKLNEALDSADNVILIFSVNRTRHFQGCA<br>KMASKIGASVGGGNWKYAHGTAHYGRNFSVKWLKCELSFHKTRHLRNPFNENLPVKISRDCQELEP<br>SIGEQLASLLYLEPDS ELMASVLA AEAKREEEK                                     |
| Potri.011<br>G089800.1    | PtDC2<br>A | VLYVVVFWLRVKLYFIVKSCNLENLELSVQQGVWATQRSNEPKLNEAFDSAENVILIFSVNRTRHFQGC<br>AKMTSKIGASVGGGNWKYAHGTAHYGRNFSVKWLKCELSFHKTRHLRNPFNENLPVKISRDCQELE<br>PSIGEQLASLLYLEPDSLMAISVAAEAKREEEK                                        |
| Potri.001<br>G113500.1    | PtDC1B     | SSINKKRKLCNTRYFIIKSLNQHN IQLSIENGIWATQVRNEPILEEAFHNSGRVILIYSVNMSGFFQGYAQ<br>MISSVGWRHDNLWSESGKSNPWGRSFKVKWLR LNDLPFQKTLHLKNPLNDYKPVKISRDCQELPED<br>IGEALCELIDGERD TDGMVKSFP RDDLPMKR                                    |
| GSVIVT0<br>102549400<br>1 | VvDF1<br>A | DRTSVFPDRDQYNHADFPVEHTEAKFFIIKSYSSEDDVHKS IKYNVWASTPNGNKKLDAAYREAEQKSA<br>GCPVFLFFSVNTSGQFVGLAEMVGHVDFHKNVEYWQQDKWNGCF SVKWHVVKDV PNSLLKHITL E<br>NNENKPVTNSRDTQEVKLEQGLQMLKIFKEHCSKTCILDDFAFYESRQKTIQEKKAKQQQF         |
| GSVIVT0<br>103339500<br>1 | VvDF2<br>A | GNLTLVPDKEQYNSEDFPENYS DAKFFIIKSYSSEDDVHKS IKYNMWASTANGNKKLDAAYQEAQGKS<br>GSCPIFLFFSVNASGQFVGVAEMVGSVDFNRSLEYWQQDKWTGCFPVKWHVIK DIPNSLLKHITLENN<br>ENKPVTNSRDTQEVKF EQGIQVLKIFKNHSSKTTILDDFGFYEARQRTMQEKKAKQQLF         |
| GSVIVT0<br>102946000<br>1 | VvDF1<br>B | STSTAKTNDGLYNQLSFVTEYKDAKFFIIKSYSSEDNVHKS IKYGVWASTPNGNRKLD AAYREAKEKQA<br>ACPVLLFSVNASAQFCGVAEMVGPVDFDKSV DYWQQDKWSGQFPVKWHI IKDVPNSQFRHIVLENN<br>NDNKPVTNSRDTQEVKLEQGI EILNIFKNYETDTSILDDFDFYEDRQKAMQERKARQQAS        |
| GSVIVT0<br>101049400      | VvDF2<br>B | NGTCTGVHRESYNRLDFVTEYKDAKFFVIKSYSSEDNVHKS IKYGVWVSTPNGNKRLNSAFHEAKEKHG<br>NCPIFLFFSVNASAQFCGVAEMVGPVDYDKSV DYWKQDKWTGQFPVKWHI IKDVPNSQFRHIILENN                                                                         |

|                                           |           |        |                                                                         |
|-------------------------------------------|-----------|--------|-------------------------------------------------------------------------|
|                                           | 1         |        | DNKPVTNSRDTQEVELEQGNEMLNIFRNYESDSSILDDDFDYEDRQKAMQEKKTQHKAS             |
| <i>Vitis<br/>vinefera</i>                 | GSVIVT0   | VvDF3  | DASNSVVHFDSDYNQPDFVTDYENAKFFIIKSYSEDNVHRSIKYSVWASTALGNRKLDAAYQKAKEIETN  |
|                                           | 103223600 | B      | CPIFLCFSVNASSQFCGVAEMVGPVNFEKDAEYWQQDRWSGLFPVKWHIIKDVPNLSLFRHILNEN      |
|                                           | 1         |        | KPVTHSRDTQEVNLEQGIEMLKIFKSYDAHTSILEDFFDYEQRERASKERKARQQAC               |
|                                           | GSVIVT0   | VvDF1  | AQGNIIYTDQYNKDDFPVDYDAKFFVIKSYSEDDVHKSIXYNVWSSTPNGNKKLENAYEDAQRIAL      |
|                                           | 101764900 | C      | GKRRGCPILFFSVNASGQFCGVAEMIGPVDHFKDMDFWQQDKWWSGFPVKWHIIKDVNTNFRHII       |
|                                           | 1         |        | ENNENKPVTNSRDTQEIRFKQGLEMLKIFKNHTTKTSLDDDFMYENRQRMQDEKTRLLIK            |
|                                           | GSVIVT0   | VvDF2  | NCIASLIRRDQYNLPDFPTKYDHAFFVIKSYSEDDIHKSIXYNVWASTPNGNKRDLGAYQEAKERMGD    |
|                                           | 103669600 | C      | RGSKCPVFLFFSVNASGQFCGVAEMIGRVDFNKNMDFWQQDKWNGFFPVKWHIIKDVNPQLRHII       |
|                                           | 1         |        | ENNDNKPVTNSRDTQEVRFQGIEMLNIFKNYVSKTSILDDDFDYESRQKVMQDKKIKPSMP           |
|                                           | GSVIVT0   | VvDF3  | EELGLMVRDRDQYNLQDFQTEYENAKFYVIKSFSEDDIHKCIKYDVWASTPNGNKKLDAAFHDAEAKA    |
| <i>Sonalu<br/>m<br/>lycopers<br/>icum</i> | 102324800 | C      | NETGTFPIFLFFSVNGSGQFVGVAEMVGQVDFNKMDFWQLDKWNGFFPVKWHIVKDIPNSQLRHI       |
|                                           | 1         |        | TLESNENRSVTTYTRDTQEIGLKQGVEMLKIFKNYSARTSMFDDFNFYENREKSLHARRSSKPPP       |
|                                           | XP_00228  | VvDC1  | NKTASPLPQGISRYFIVKSCNRENLELSVQQGVWATQRSNEAKLNEAFDSVENVILIFSVNRTRHFQGC   |
|                                           | 1594.1    | A      | AKMTSKIGGFVGGGNWKYAHGTAHYGRNFSVKWLKLCESLHFKTRHLRNPYNENLPVKISRDCQELE     |
|                                           |           |        | PSIGEQLASLLYLEPSELMAISLAAESKREEK                                        |
|                                           | GSVIVT0   | VvDC1  | SSANKKGKLYSTRYFIKSLNHHNIQLSMEKGIWATQVMNEPILEEAFHNSGKVLIFSVNMSGFFQGYA    |
|                                           | 101989500 | B      | QMMSSVGWRRDNVWSQSGGNNPWGRSFKVKWLRHLDPFQKTLHLKNPLNDYKPKISRDCQEL          |
|                                           | 1         |        | SQEIGEALCELLDGKTDVGDNLKNDVSGDDLPPRR                                     |
|                                           | Solyc01g0 | SIDF1A | DKPSLMPDREQYNHPDFPVTYADAKFFIIKSYSEDDVHKSIXYNVWASTPNGNKKLDAAYQEAQQNS     |
|                                           | 28860.2.1 |        | GGCPVFLFFSVNTSGQFVGVAEMVGPVDFNKNVEYWQQDKWVGCFFPVKWHIVKDVPNSLLKHITLE     |
| <i>Medicag<br/>o<br/>truncat<br/>ula</i>  |           |        | NNENKPVTNSRDTQEVKVEQGLQVLKIFKDHISKQCILDDFEFYEDRQKRIQDKKAKQQLF           |
|                                           | Solyc05g0 | SIDF1B | VELTSILQPGQYNRPEFVTDYEHAKFFVIKSFSEDDNVHKSIXYGVWASTPQGNRKLDAAYAEAKEMNA   |
|                                           | 32850.2.1 |        | NCPVFLFFSVNASGQFCGVAEMVGPIDFENSAEYWQQDRWSGKFPVKWHIVKDVPNSQFRHILLEHN     |
|                                           |           |        | DNKPVTHSRDSQEVKLPEGLEMLKIFKNYETDTSLLDDFTYDEREKSLEKSKQRPL                |
|                                           | Solyc12g0 | SIDF1C | VQGNIVIHADENRGLMDFVNAKFFVIKSYSEDDVHKSIXYNVWSSTPNGNKKLNSAYEDAQRITP       |
|                                           | 99090.1.1 |        | GNPRGCPILFFSVNASGQFCGVAEMTGPVDFYKDMDFWQQDKWWSGFPVKWHFIKDVPNPFRHII       |
|                                           |           |        | LENNENKPVTNSRDTQEIRYKKGIEMLKVFKDYASRTSLDDDFMYENRQKLQEEKAKLLIR           |
|                                           | Solyc01g1 | SIDF2C | DQLVPAVQREKYNKEDFKTQYDNAKFIKSYSEDDIHCKVKYDVWSSTPNGNKKLDTAFVESEAKAS      |
|                                           | 03540.2.1 |        | GTGSSCPVFLFFSVNGSGQFLGVAEMVGQVDFNKNMDFWQLDKWWSGFFPLKWHIVKDVPNTQFRHII    |
|                                           |           |        | LENNENRNPVTYSRDTQEIGLKEGLEMLNLKNYSEKTSILDDFNFYEKREKVLKAKRSSKPIV         |
| <i>Medicag<br/>o<br/>truncat<br/>ula</i>  | Solyc02g0 | SIDC1A | DRTAVVLPQGTSRYFIVKSCNRENLELSVQQGVWATQRSNEAKLNEAFDSVENVILIFSVNRTRHFQGC   |
|                                           | 21760.2.1 |        | GKMTSRIGGAANGGNWKHEHGTAYHYGRNFSVKWLKLCESLHFKTRHLRNPYNENLPVKISRDCQEL     |
|                                           |           |        | EPSVGEQLASLLYLEPSELMAISLAAESKRLEEK                                      |
|                                           | Solyc02g0 | SIDC2A | NQAAIPLPQGSPRYFIVKSCNRENLELSVQQGVWATQRSNEAKLNEAFDSVENVILIFSVNRTRHFQGL   |
|                                           | 70240.2.1 |        | AKMTSRIGGAANGGNWKHEHGTAYHYGRNFSVKWLKLCESLHFKTRHLRNPYNENLPVKISRDCQEL     |
|                                           |           |        | EISVGEQLASLLYVEPSELMAISLAAESKREEER                                      |
|                                           | Solyc08g0 | SIDC1B | STAIEKGKLYSIRYFVIKSLNHNENIQLSVNRGIWATQAMNEAILDEAFHNSSKVLIFSVNTSGYFQGYAQ |
|                                           | 07730.2.1 |        | MISSVGLRRDQVWSQGNNGRNSWGRSFEVNWRLRYDLFPQRTLHLKNPWNQNKPKISRDCQELPP       |
|                                           |           |        | DIGEALCELLDGQDALDVNLKMDVFAELNLSKR                                       |
|                                           | Medtr8g0  | MtDF1  | EKNSTTPDREQYNKADFPEEYTDKFFVIKSYSEDDIHKSIXYNVWASTQNGNKKLDAAYQEAQQKSG     |
| <i>Medicag<br/>o<br/>truncat<br/>ula</i>  | 88390     | A      | GCPILFFSVNTSGQFVGLAEMTGPVDFNKSLEYWQQDKWMGCFPLKWHIVKDVPNNVLRHITLNN       |
|                                           |           |        | ENKPVTNSRDTQEIMLEPGLKLLKIFKEYSSKTCILDDFGFYEGRQKTILEKKAKQQFP             |
|                                           | Medtr7g0  | MtDF2  | EVVPLVLNKEQYNGEDLSENYSDAKFFIIKSYSEDDVHKSIXYSVWASTPNGNKKLDAAYQEAGGCPIF   |
|                                           | 85500     | A      | LLFSVNTSGQFVGLAEMTGPVDFDKTVEYWQQDRWTGCFNVKWHIIKDIPNGVLRHITLNNENKPV      |
|                                           |           |        | TNSRDTQEVKFEKGVQIVKIFKEHASKTSILDDFGFYESREKTTQERKFKEQQL                  |
|                                           | Medtr6g0  | MtDF3  | KEVHPVPDKQQYTGEDLSENYSDAKFFVIKSYSEDDIHKSMKYNVWTSTPNGNKKLDAAYLEAKEKSA    |
|                                           | 32970     | A      | DCPIFLFFSVNTSGQFVGLAEMVSPVDFDRTVEYWQQDRWTGCFSVKWRIKDIPNNVLRHITLNNEN     |
|                                           |           |        | KPVTNSRDTQEVKFEKGVLEILKIFKEHSSKTCILDDFAFYAREKTIQEKKAKEQLS               |
|                                           | Medtr4g0  | MtDF1  | NASTAKFQDESLNRPDFAFDKDAKFFVIKSYSEDNVHKSIXYGVWASTPNGNKRKLDAAYCQAKEKQ     |
|                                           | 05110     | B      | DACRIFLFFSVNASSQFCGVAEMVGPVNFDSVDFWQQDKWWSGQFPVKWHIIKDVPNNSQFRHIVLEN    |
| <i>Medicag<br/>o<br/>truncat<br/>ula</i>  |           |        | NDNKPVTNSRDTQEVKLQQGIEMLTIFKNYETDTSILDDDFDYEDRQKAMQERKARQQSS            |
|                                           | Medtr4g1  | MtDF1  | NTQENIIYTDQYNREDFPIDNEIAKFFVIKSYSEDDVHKSIXYNVWSSTPHGNKKLQSAYEDARRKATG   |
|                                           | 23630     | C      | KSGGCPILFFSVNASGQFCGVAEMVGPVDFNKMDFWQQDKWWSGFPVKWHIIKDVPNNGNFRHII       |
|                                           |           |        | LENNENKPVTNSRDTQEIMYRKGLEMLKIFKNYTLKTSLLDDFIYENRQKVMQEEKTKFLMK          |
|                                           | Medtr2g0  | MtDF2  | VNGNTKIRTDQYNLPDFPTKYDHALFFVIKSYSEDDVHKSIXYDVWASTPNGNKRDLNADFQDAQNRM    |
|                                           | 63460     | C      | EEKGSKCPVFLFFSVNASGQFCGVAEMIGRVDFNKSMDFWQQDKWNGFYFPVKWHIIKDIPNPQLRHII   |
| <i>Medicag<br/>o<br/>truncat<br/>ula</i>  |           |        | LENNNDHKPVTNSRDTQEIHFPQGIEMLNIFKNYVSRTSILDDDFDYESRQKVMQEKKIRQPM         |
|                                           | Medtr2g0  | MtDF3  | EQDSIIYTDQYNKEDFPLDYDNAKFFVIKSYSEDDVHKSIXYNVWSSTVHGNRKLGNAYEDTKKVS      |
|                                           | 32660     | C      | AEKSGVCPILFFSVNASGQFCGVAEMIGSVDFNKMDFWQQDKWWSGFPVKWHIIKDVPNPNFRHII      |
|                                           |           |        | LDNNENKPVTNSRDTQEIMYSKGLEMLKIFKNHTLKTSLDDDFMYENRQKIMHDDQAKALLIR         |

|                                      |                       |             |                                                                                                                                                                                                                 |
|--------------------------------------|-----------------------|-------------|-----------------------------------------------------------------------------------------------------------------------------------------------------------------------------------------------------------------|
| <i>Citrus<br/>sinensis</i>           | Medtr2g0<br>05840.1   | MtDF4<br>C  | DEFAFTVCRDQYNLPDFQTKYETAKFYMIKSFNEDDIHKGIKYDVWTSTPHGNKKLNAAFQNAEAKL<br>SQTGTQCPIFLFFSVNASGQFVGVAEMLGPVDFKKDMKFWKLDKYNNGFFPIKWHIIKDVPNRQFAHIT<br>LQINENKCVTFSRDTQEITLKEGLEMLKIFKSYPAKTSLDDDFYENREKLCSQRTEHTGW    |
|                                      | orange1.1<br>g005158m | CsiDF1<br>A | DKISLSPDRDEYNKADFPEEYTDAKFFVIKSYSEDDVHKSIIKYSVWASTPNGNKKLDAAYQEAQQKSRS<br>CPVFLFFSVNTSGQFVGLAEMAGPVDNFKNVEYWQQDKWTGCFPVKWHIVKDVNPNSLLKHITLENN<br>ENKPVTNSRDTQEIKLEQGLKLIKIFKDHPSTKILDDDFGYETRQKTIQEKKAKQQQF     |
|                                      | orange1.1<br>g010141m | CsiDF2<br>A | DNLPLIPDKEKYSGEDFPESYSDAKFFIIKSYSEDDVHKSIVKYNMWTSTPNGNKKLDAAYREAKEKSSD<br>CPVFLFFSVNASGQFVGVAEMVGPVDFDKTVEYWQQDKWVGCFPLKWLIIKDVNPNSSLRHITLENNE<br>NKPVTNSRDTQEVNFEIGIQILKIFKSHSSKRCILDDDFGYEARERIMQQKKAKQHQQL   |
|                                      | orange1.1<br>g005934m | CsiDF1<br>B | SKSVVKILDESYNQPDFVTDYKDAKFFIIKSYSEDDVHKSIIKYGWASTPNGNKKLDAAYCEAKEKQDP<br>CPVFLFFSVNASAQFCGVAEMIGPVDFEKSVDYWQQDKWSGQFPVKWHIIKDVNPNSQFRHIVLENND<br>NKPVTNSRDTQEVKLEQGIEMLNIFKNYVTDMSILDDDFYEDRQKAMQERKARQQAS      |
|                                      | orange1.1<br>g038459m | CsiDF2<br>B | NSSGSGINFELYNQDFPTDYENAKFFVIKSFSEDDVHKSIIKYGWASTPHGNKKLDAAYHEAKETDN<br>RCPIFLFFSVNASGQFCGVAEMVGPVDFENSADYWQQDRWSGQFPVKWLIKDVNPNSRFRHLLLENN<br>DNKPVTNSRDSQEVKLEQGVEMLRIFKEHDARTSILDDDFYDERERSLKERRAKQQVS        |
|                                      | orange1.1<br>g006798m | CsiDF3<br>B | NGTLDGILKGSYNQLDFVTNYKVAKFFIIKSYSEDDVHKSIIKYLWASTPNGNKKLDAAYREAKEKHG<br>TCPIFLLFSVNASAQFCGVAEMVGPVDFDKSVDYWLQDKWSGQFPVKWHIIKDVNPNSQFRHIILEKND<br>NKPVTNSRDTQEVLEQGIEMLNIFKNYESYSSILDDDFHFEYEQRQKAMQERKAGQQAN    |
|                                      | orange1.1<br>g005441m | CsiDF1<br>C | VEGNIICTEHYNKEDFQVDYVDAKFFVIKSYSEDDVHKSIIKYGWSSSTSHGNKKLQSAVEDAQKLAAG<br>KPGGCPIFLFFSVNASSQFCGVAEMIGPVDYKDMDFWQQDKWSGSFPVKWHIIKDVNPNTSLRHILRN<br>NENKPVTNSRDTQEIMHTEGLEMLKIFKNHPRDTSILDDDFMYYEKRQKFMQEERARLVFK  |
|                                      | orange1.1<br>g008255m | CsiDF2<br>C | EVLSPTVSRDQYNLPDFQVEYEKAKFYVIKSYSEDDIHKCIKYDVWSSTPNGNKKLDATFNEAEAKADE<br>TGTRCPIFLFFSVNGSGQFVGLAEMMGKVDNFKNMDFWQLDKWNGFFPVKWHIVKDVNPNTLLRHITL<br>ENNENKPVTNSRDTQEIGLKQGLEMLKIFKSYSAKTSLDDDFNFYENKERSFHGKSSKSPAT |
|                                      | orange1.1<br>g048663m | CsiDF3<br>C | DSISLIWKDQYNLPDFRIKYDHALFFVIKSYSEDDIHKSIKYSVWSSTPNGNKKLDAAYEDAQSRIAEKG<br>SKCPVFLFFSVNASGQFCGVAEMIGRVDNFKNMDFWQQDKWNGYFPVKWHIIKDVNPNSQFRHIILEN<br>NDKKPVTNSRDTQEVKFPQGIELNIFKNYPSKTSILDDDFYESRQKVMQEKKVRLSVS    |
|                                      | orange1.1<br>g005338m | CsiDC1<br>A | NRNATPLPQGISRYFIVKSCNRENLELSVQQGVWATQRSNEAKLNEAFDSAENVILFSVNRTRHFQGC<br>AKMTSKIGGSVGGGNWKYAHGTAHYGRNFSVKWLKLCESFHKTRHLRNPYNENLPVKISRDCQELE<br>PSIGEQLAALLYLEPDSELMAISVAAEAKREEEK                                |
| <i>Arabido<br/>psis<br/>thaliana</i> | orange1.1<br>g015749m | CsiDC1<br>B | STDNNKGKLYNTRYFIIKSLNHQNIQLSIEKEIWATQVMNEPILEEAFHNSGKVLIFSVMMSGFFQGYA<br>QMMSSVGWRRDNVWSQGNGKNNPWGRSFKVKWLRNLTLPFQKTLHLKNPLNDYKPKISRDCQEL<br>PQDIGEALCHLLDGKDDVDGIQTSFHRDDLPAKR                                 |
|                                      | AT3G039<br>50         | ETC1        | DVSAVDLQRYNGENFPESFVKAKFFVIKSYSEDDVHNCIKYGAWSSSTPTGNKKLNAAAYEAKENSQEC<br>PVYLLFSVNASGQFVGLAEMVGPVDNFNKTMEYWQQDKWIGCFPVKWHIIKDVNPNSLLRHITLANNEN<br>KPVNTNSRDTQEVNLEHGTKIIKIFKEYMSKTCILDDYKFYETRQKIIRDKKIKQKKQ    |
|                                      | At3g1346<br>0         | ECT2        | DNTCVVPDREQYNKEDFPVDYANAMFFIIKSYSEDDVHKSIIKYNVWASTPNGNKKLAAAYQEAQQK<br>AGGCPIFLFFSVNASGQFVGLAEMTGPVDFNTNVEYWQQDKWTGSFPLKWHIVKDVNPNSLLKHITL<br>NNENKPVTNSRDTQEVKLEQGLKIVKIFKEHSSKTCILDDFSFYEVROKTIKAKQQTQK       |
|                                      | AT5G610<br>20         | ECT3        | SEDVSLDPKDYNKIDFPETYTEAKFYVIKSYSEDDIHKSIKYSVWSSTPNGNKKLDASYNEAKQKSDGC<br>PVFLFFSVNTSGQFVGLAEMVGPVDNFNKTVEYWQQDKWIGCFPVKWHFVKDIPNSSLRHITLENNE<br>KPVNTNSRDTQEVKLEQGIKVIKIFKDHAASKTCILDDFEFYENRQKIIQERKSKHLQI     |
|                                      | AT1G555<br>00         | ECT4        | TVTCVLPDREECNRDDFPVEYKDAKFFIIKSYSEDDVHKSIIKYNVWASTPNGNKKLDAAYQEAQQKSS<br>GCPVFLFFSVNASGQFIGLAEMKGPVDNFNKNIEYWQQDKWTGSFPLKWHILKDVNPNSLLKHITLEYNE<br>NKPVTNSRDTQEVKLEQGLKVVKIFKEHNSKTCILDDFSFYEARQKTIKAKKQQQS     |
|                                      | AT3G130<br>60         | ECT5        | NKGSACEHEESNADFVTDYTNALFIIKSYSEDDVHKSIIKYNVWASTPNGNKKLDAAYREAKDEKE<br>PCPLFLFFSVNASSQFCGVAEMVGPVDFEKSVDYWQQDKWSGQFPVKWHIIKDVNPNSQFRHIILENND<br>NKPVTNSRDTQEVKLEQGIEMLNIFKNYDADTSILDDDFGYEEREKIIQDRKARRQPS       |
|                                      | AT1G279<br>60         | ECT9        | SKMISYDRVDRFCQQLSQRDAKFFVIKSYSEDDVHKSIIKHCVWASTKNGNKKLDAAYREAKKDV<br>ACPVFLFFSVNASSQFCGVAEMVGPVDNFNTSVEYWQQDRWSGHFPVQWLIVKDVNPNSLFRHIIIESND<br>NKPVTNSRDTQEVGLEKGIEMLDIFISCEMRSSILDDFNFYERQIAIQDRKARQRAV        |
|                                      | AT5G581<br>90         | ECT10       | DSSTAGPNPSLYNHPEFVTDYKNAKFFIVKSFSEDDVHRSIIKYNVWASTPHGNKKLDTAYRDAEKM<br>GKCPIFLFFSVNASGQFCGVSEMVPVDFEKDAGYWQQDRWSGQFPVKWHIVKDVNPNSRFRHILHNN<br>NDNKPVTNSRDSQEVKLRQGIEMLRIFKEYEAHTSILDDFGYDELEGQKVGEDGTRKKA       |
|                                      | AT3G173<br>30         | ECT6        | AEGNIVINPDYRNKEDFSIEYSDARFFVIKSYSEDDVHKSIIKYGWSSSTLNGNKKLQSVYEDAQRATEK<br>SRECPILFFSVNSSGLFCGVAEMTGPVSFDRDMDFWQQDKWSGSFPVKWHIIKDVNPNSYFRHILHNN<br>ENKPVTNSRDTQEIIKQGLEVLKLFKHHAECTSLDDDFMYEDRQRLMQEERARLPFR     |
|                                      | AT1g4811<br>0         | ECT7        | AEGNIVINPSQYNKEDLRIDYNAKFFVIKSYSEDDVHKSIIKYNVWSSTLHGNKKLQSAVEDAQRIATE<br>KSCECPILFFSVNASGLFCGMAEMTGPVSFDDKMDFWQQDKWSGSFPVKWHIIKDVNPNSYFRHILQ<br>NNENKPVTNSRDTQEIMLKQGLEVLKIFKDHMERTSLLDDFVYYESRQRMQDERTLPYR     |
| <i>Arabido<br/>psis<br/>thaliana</i> | AT1G792<br>70         | ECT8        | NGVGSVIRRDQYNLPDFQTKYEEAIFVIKSYSEDDIHKSIKYNVWSSTLNGNKKLDSAYQESQKKAADK<br>SGKCPVFLFFSVNASGQFCGVAEMIGRVDYEKSMEFWQQDKWTGYFPVKWHIIKDVNPNSQFRHIILEN                                                                  |

|                    |              |                 |                                                                                                                                                                                                                |
|--------------------|--------------|-----------------|----------------------------------------------------------------------------------------------------------------------------------------------------------------------------------------------------------------|
|                    |              |                 | NENKPV TNSRDTQE VRLPQGNEVLNIFKNYAAKTSILDDDFYENREKVMVQKKLRFPV                                                                                                                                                   |
| AT1G098<br>10      | ECT11        |                 | NSFALALRREMYNLPDFQTDYEDAKFFVIKSYSEDDVHKSISKYSVWSSTINGNKKLDAAFRDAETKTLE<br>DGKKRPIFLFFSVNASRQFVGLAEMVGVDNFNKLDFWQVDKWSGFFPVEWHVVKDIPNWELRHIL<br>DNNE DKPVTHTRDTHEIKLKEGLQMLSIFKKYSAVTFLLDDMDFYEEREKSLRAKKEHKPAT |
| AT1G304<br>60      | CPSF30       |                 | NRTSHPLPQGVNRYFVVKSNRENFE LSVQQGVWATQRSNEAKLNEAFDSVENVILIFSVNRTRHFQ<br>CAKMTSRIGGYIGGGNWKHEHGT AQYGRNFSVKWLKLCESFHKTRNLNPNYENL PVKISRDCQEL<br>EPSVGEQLASLLYLEPDSELMAISIAAEAKREEEK                              |
| AT4G119<br>70      | ECT12        |                 | KANKNSKPGYRTRYFIIKSLNYDNIQVSVEKGIWATQVMNEPILEGAFHKSGRVILIFSVNMSGFFQGYA<br>EMLSPVGWRRDQIWSQGGGKNNPWGRSFKVKWLRLSELFPQKTLHLKNPLNDYKPVKISRDCQELPE<br>DIGEALCELLDANSCDDGLLNSSSRDDYSTKR                              |
| Cch01T00<br>2587.1 | CchYT<br>H1  |                 | NAKFFVIKSYSEDDVHKGIKYNVWSSTPNGNKKLQSA YEDAQRIASGEPRGCAIFLFFSVSDIPLILSFAL<br>KYYIPQVNASGQFCGVAEMTGPVDFHKDMDFWQQDKWSGSFPVKWHIIKDVPNP NFRHIILENNEN<br>KPV TNSRDTQEIRCRQGIEMLKIFKLYTSK                             |
| Cch02T00<br>2736.1 | CchYT<br>H2  |                 | NAKFFVIKSYSEDDVHKGIKYNVWSSTPNGNKKLRSAYEDAQRIAFGEPRGCPIFLFFSVRDIPLILSFAL<br>KYYIPQVNASGQFCGVAEMTGPVDFHKDMDFWQQDKWSGSFPVKWHIIKDVPNP NFRHIILENNEN<br>KPV TNSRDTQEMFFSTHYAGDNLTIKLRD                               |
| Cch02T00<br>3694.1 | CchYT<br>H3  |                 | DAKFFI KSYSEDNVHKS IYGIWASTPNGNRKLDAA YREAKEKNTCPVFLFFSVN ASAQFCGVAEMV<br>GPVDFDKSDY WQQDKWSGQFPVKWHIIRDVPNSQFRHIVLENNDNKPV TNSRDTQEAKLEQGIEML<br>KIFNNYES                                                     |
| Cch03T00<br>2158.1 | CchYT<br>H4  |                 | NAKFFI KSFSEDNVHKS IYSVWASTPLGNRKLDAA YHEVKDANGHCPVFLFFSVN ASGQFCGVAEM<br>IGPVDFEHDVDY WQQDRWSGQFPVRWHI IKDVPNNQFRHILENNNDNKPV THSRDSQEVKLEQGIEL<br>KIFKDYEA                                                   |
| Cch05T00<br>0069.1 | CchYT<br>H5  | <i>Camellia</i> | NAKFFVIKSYSEDDVHKS IYNVWSSTPNGNKKLQSA YEDARRIAAGEPRGCPVFLFFSVN ASGQFCGV<br>AEMTGPVDFYKDMDFWQQDKWSGSFPVKWHI IKDVPNP NFRHIILENNENKPV TNSRDTQEVCVFVIP<br>DTLFTC                                                   |
| Cch07T00<br>0910.1 | CchYT<br>H6  | <i>a</i>        | NAKFFVIKSYSEDDIHKCIKYDVWSSTPNGNKKLDA AFHDAEAKACETGT KCPIFLFFSVN GSGQFIGV<br>AEMIGPVDFNKDMDFWQLDKWNGFFPVKWHI IKDTPNTQLRHIILENNDNRSVTYSRDTQEIGFKQGI<br>EMLNIFNSYSE                                               |
| Cch08T00<br>1554.1 | CchYT<br>H7  | <i>chekiang</i> | ISRYFIVKSCNRENLELSVEQGVWATQRSNEAKLNEAFDSVENVILIFSVNRTRHFQGC AKMTSKIGGSV<br>GGGNWKYAHGSAHYGRNFSVKWLKLCESFHKTRLLRNPNYENL PVKISRDCQELEPSVGEQLASLLY<br>LEPD                                                        |
| Cch09T00<br>4551.1 | CchYT<br>H8  | <i>oleosa</i>   | NAKFFVIKSYSEDDVHKGIKYNVWSSTPNGNKKLQSA YEDAQRIASGEPRGCAIFLFFSVSDIPLILSFAL<br>KYYIPQVNASGQFCGVAEMTGPVDFHKDMDFWQQDKWSGSFPVKWHI IKDVPNP NFRHIILENNEN<br>KPV TNSRDTQEIRCRQGIEMLKIFKLYTS                             |
| Cch12T00<br>1174.1 | CchYT<br>H9  |                 | DAKFFI KSYSEDDVHKS IYNVWASTPNGNKKLDA A YQEAQQKSGGCPVFLFFSVNTSGQFVGVAEM<br>TGPVDFHKNF EYWQQDKWNGCFPVNWHIVKDVSNLLKHITLENNENKPV TNSRDTQEVKLEQGLQ<br>LLKIFKDHSSK                                                   |
| Cch13T00<br>1809.1 | CchYT<br>H10 |                 | GTRYFIIKSLTHQNIQLSIEKGIWATQVMNEPILEEAFHNSSK VILIFSVNMSGFFQGYA QMMSSVGWRR<br>DNVWSQSGGKNPWGRSFKVKWLRLHDLFPQKTLHLKNPLNDYKPVKISRDCQELPDIGEALCELL<br>DGKDD                                                         |

\* All accession numbers relate to the JGI Phytozome, Metazome or MycoCosm databases  
 \*\* In cases when a name was already attributed to a protein, this name was kept with the new name, referring to the species of origin and to the phylogenetic classification of the protein, added in parenthesis  
 \*\*\* For these species, only the core YTH motif are indicated

**Table S2.** Conserved Motif analysis of YTH proteins in *Camellia chekiangoleosa*.

| Motif | Logo | E-value  | Sites | Width |
|-------|------|----------|-------|-------|
| 1     |      | 1.3e-218 | 8     | 50    |
| 2     |      | 4.9e-215 | 7     | 50    |
| 3     |      | 1.2e-096 | 4     | 50    |
| 4     |      | 7.3e-088 | 4     | 49    |
| 5     |      | 2.3e-084 | 4     | 50    |
| 6     |      | 4.6e-084 | 10    | 21    |
| 7     |      | 1.6e-052 | 4     | 42    |



|    |                                                                                   |          |    |    |
|----|-----------------------------------------------------------------------------------|----------|----|----|
| 8  |  | 6.5e-050 | 5  | 40 |
| 9  |  | 4.1e-045 | 4  | 29 |
| 10 |  | 1.7e-043 | 10 | 15 |

**Table S3.** Primer sequences.

| Primer Name    | Primer Sequence (5'-3')                        |
|----------------|------------------------------------------------|
| CchYTH1-Q-F    | GGTGCTATGTTAGGAGTTG                            |
| CchYTH1-Q-R    | AAGCCATTACTAGAAGTGAGA                          |
| CchYTH2-Q-F    | CAAGAACGGTACAATCAGC                            |
| CchYTH2-Q-R    | TACACGAAACTCACCAAAT                            |
| CchYTH3-Q-F    | ATGAGTCTTACAACCTGCCCGAA                        |
| CchYTH3-Q-R    | GTGTGCTGGCCCATATACCAT                          |
| CchYTH4-Q-F    | AGTCTTTCTCTTGTTTCGGTCA                         |
| CchYTH4-Q-R    | CTTTGATTATATGCCACCGGACA                        |
| CchYTH5-Q-F    | CCCTTCTTAGATACTGGTGCAT                         |
| CchYTH5-Q-R    | TACCCTAGCAAAGGAACGTGTC                         |
| CchYTH6-Q-F    | GCAAGCTTCATCTCAAACCGAA                         |
| CchYTH6-Q-R    | TGCTGCTTCTTCAGTTGTCGTT                         |
| CchYTH7-Q-F    | CGGCTAACGACAAGAACGA                            |
| CchYTH7-Q-R    | TCATCAGCTCCCGAACCAC                            |
| CchYTH8-Q-F    | GACGCTGTTGTAGGTAATG                            |
| CchYTH8-Q-R    | GATGTAGCTGATCGGAGAT                            |
| CchYTH9-Q-F    | CGTCCTCATTCTCATCTCA                            |
| CchYTH9-Q-R    | TCTAAAGGTGCTTCCATAC                            |
| CchYTH10-Q-F   | TCTAAAGGTGCTTCCATAC                            |
| CchYTH10-Q-R   | CGCAGCCATTTACCTTAA                             |
| Actin-F        | GTGGTTGTGAATGGAGGGCA                           |
| Actin-R        | AGGCCAGGAGACCCATTACA                           |
| CchYTH9-F      | ATGGTTTCATCAATATCACATGGAAATAACTCCCC            |
| CchYTH9-R      | CATGGGAAAAAATGTACCCTCAACATTTGCAA               |
| 1305-CchYTH9-F | TTTGGAGAGAACACGTCTAGAATGGTTTCATCAATATCACATGGAA |
| 1305-CchYTH9-R | CTTGCTCACCATGTAGTCGACCATGGGAAAAAATGTACCCT      |

**Table S4.** PLAAC of YTH proteins in *Camellia chekiangoleosa*.

| Protein Name | LLR   | PAPAp <sub>prop</sub> | PAPAf <sub>i</sub> |
|--------------|-------|-----------------------|--------------------|
| CchYTH1      | 1.709 | -0.043                | -0.126             |
| CchYTH2      | 7.976 | 0.011                 | -0.005             |
| CchYTH3      | 8.537 | -0.022                | -0.004             |
| CchYTH4      | 5.516 | 0.047                 | -0.043             |

|          |         |        |        |
|----------|---------|--------|--------|
| CchYTH5  | 10.072  | 0.023  | -0.002 |
| CchYTH6  | 10.361  | 0.109  | -0.096 |
| CchYTH7  | 23.847  | 0.019  | -0.173 |
| CchYTH8  | 6.537   | -0.007 | -0.005 |
| CchYTH9  | 11.980  | 0.016  | -0.168 |
| CchYTH10 | -11.558 | 0.053  | -0.007 |

CchYTH7 LFGPPPPVEEVLQKIQQMTSYNYGNSNRFTQNRNSNYPQQTEKPOFPQGFNAANQVTAAKSSTTESPNMQLQQQVQQSQQQVGQTQIQNFPNGQQNQGNKSSTPLPQ 107  
 CchYTH10 EPILEEAFHNSSKVLIFSVNMSGFFQGYAQMMSSVGWRRDNVWSQSGGKKNPWGRSFKVKWLRRLHDLPFQKTLHLKNPLNDYKPKVKSIRDCQELPQ 97  
 CchYTH6 LPLDSRSRKSAASSNISKSIIESQPLKTLGKLGSGYQSANLMKGYHPVGNFSSFTNQQGVIMHNSSMNYRSNSRVWNGNKNFNLDRNVGFDASSELTCGPRAQNGSNPSNF 114  
 CchYTH8 LPYVYHTPSYGYAQSPYNPNYPYIPGAMIGVDGPFGRGAQAVDNISHGKALSHRNQLKMAITSSNGLSNFGSSAHGGAAVEKIRSKFHYGRVLNDVNGSPDALTERNRGPRTNKSKNHLAVKAYTTRAGESDAQ 133  
 CchYTH5 LPYVYHTPSYGYAQSPYNPNYPYIPGAMIGVDGPFGRGAQAVDNISHGKALSHRNQLKMAITSSNGLSNFGSSAHGGAAVEKIRSKFHYGRVLNDVNGSPDALTERNRGPRTNKSKNHLAVKAYTTRAGESDAQ 115  
 CchYTH1 LPYVYHTPSYGYAQSPYNPNYPYIPGAMIGVDGPFGRGAQAVDNISHGKALSHRNQLKMAITSSNGLSNFGSSAHGGAAVEKIRSKFHYGRVLNDVNGSPDALTERNRGPRTNKSKNHLAVKAYTTRAGESDAQ 133  
 CchYTH2 LPYVYHTPSYGYAQSPYNPNYPYIPGAMIGVDGPFGRGAQAVDNISHGKALSHRNQLKMAITSSNGLSNFGSSAHGGAAVEKIRSKFHYGRVLNDVNGSPDALTERNRGPRTNKSKNHLAVKAYTTRAGESDAQ 111  
 CchYTH9 TPVPLAVKGQNTLNGTNDLEKDRSSVAPDREQYNYKDFPESYTDKFFHKSYSRDDVHKSIFYNVWASTPENGKKLDAAVQEAQKSGGCPVLFSSVNTSGQ 110  
 CchYTH3 LPSVGQDAQLSPQQYFSGFPYVQHLYPPSMQYITPFPVSQPVLSNVVSIDQQVDGMILLGRPSYPSVTSFGRGNFSGNPGGFGPHDLQQGFDAFRTSGLWSDWSKPSDRQ 103  
 CchYTH4 LPSQNDMVTSGSSGQEGLYDNVLFQPGSGYFVHFGSFGGGLSGEPLSNRSNSETGSYMSPLTSPTVYPPPIGILGPYEHNAGQVSQQQRTSHGFGFLVASSARNYPHGGSYQ 113

**Figure S1.** Y/P/Q-rich region in CchYTHs. The Y/P/Q amino acids are highlighted in yellow. The number at the end represents the number of amino acids.
